# Supplementary material
Source: publisher figshare collection journal article supplement (https://tandf.figshare.com/ndownloader/files/31585366)
Supplement: Supplementary file 1 [file 31585366]

Table S1. The participating countries’ distribution

| Country | % (% of countries’ nationality) |
| --- | --- |
| Belgium | 15% (91.4% Belgian) |
| Finland | 13.3% (96% finish) |
| France | 8% (91.6% French) |
| Chile | 7.6% (91.6% Chilean) |
| Portugal | 6.9% (86.1% Portuguese) |
| China | 6.8% (49.1% Chinese) |
| the Netherlands | 4.5% (91.1% Dutch) |
| the Czech Republic | 4.2% (95.3% Czech) |
| Poland | 3.7% (93.1% Polish) |
| Greece | 3.6% (93.5% Greek) |
| Peru | 3.3% (90.1% Peruvian) |
| USA | 2.8% (88.1% American) |
| Israel | 2.8% (88% Israeli) |
| South Korea | 2.7% (99.5% South Korean) |
| Cameroon | 2.5% (93.7% Cameroonian) |
| Lithuania | 2.5% (94.7% Lithuanian) |
| Colombia | 2.4% (94.9% Colombian) |
| Turkey | 2.1% (94.3% Turkish) |
| Vietnam | 1.9% (96.7% Vietnamese) |
| Japan | 1.3% (99.1% Japanese) |
| Egypt | 1.3% (99.1% Egyptian) |
| New Zealand | 1.0% (62.1% New Zealanders) |

Acknowledgments

We would like to thank the members of the IIPB for their contributions: Joyce Aguiar4, Ege Akgun5, Gizem Arikan6, Mariana Artavia7, Hervé Avalosse8, Kaisa Aunola9, Michel Bader10, Claire Bahati11, Elizabeth J. Barham12, Eliane Besson13, Wim Beyers14, Emilie Boujut,15 Maria Elena Brianda2, Anna Brytek-Matera16, Noémie Carbonneau17, Filipa César4, Bin-Bin Chen18, Géraldine Dorard19, Luciana Carla dos Santos Elias20, Sandra Dunsmuir21, Natalia Egorova22, Nicolas Favez23, Anne-Marie Fontaine4, Heather Foran24, Julia Fricke25, Laura Gallée2, Myrna Gannagé13, Maria Gaspar26, Lucie Godbout27, Amit Goldenberg28, Maria Ancuta Gurza29, Aamir Hashmi30, Ogma Hatta2, Thi Vân Hoang31, Mai Trang Huynh31, Furutani Kaichiro32, Kawamoto Taishi33 (Deceased 20 February 2019), Goran Knezevic34, Bassantéa Lodegaèna Kpassagou35, Ljiljana B. Lazarevic34, Sarah Le Vigouroux36, Astrid Lebert-Charron15, Vanessa Leme37, Carolyn MacCann38, Denisse Manrique-Millones39, Marisa Matias4, Tremblay Mélissa17, María Isabel Miranda-Orrego40, Marina Miscioscia41, Clara Morgades-Bamba42, Seyyedeh Fatemeh Mousavi43, Badra Moutassem-Mimouni44, Ana Muntean45, Hugh Murphy24, Josué Ngnombouowo Tenkue46, Sally Olderbak47, Sophie Ornawka17, Fatumo Osman48, Daniela Oyarce-Cadiz49, Pablo A. Pérez-Díaz50, Konstantinos V. Petrides50, Claudia Pineda-Marin51, Katharina Prandstetter24, Alena Prikhidko52, Ricardo T. Ricci53, Fernando Salinas-Quiroz54, Raquel Sánchez-Rodríguez55, Ainize Sarrionandia56, Céline Scola57, Vincent Sezibera58, Paola Silva59, Alessandra Simonelli60, Bart Soenens14, Emma Sorbring61, Matilda Sorkkila9, Charlotte Schrooyen14, Elena Stănculescu62, Elena Starchenkova63, Dorota Szczygiel64, Javier Tapia65, Minh Thuy Tri33, Mélissa Tremblay17, A. Meltem Ustundag-Budak66, Maday Valdés Pacheco67, Lesley Verhofstadt14, Jaqueline Wendland15, Saengduean Yotanyamaneewong68

4University of Porto, Faculty of Psychology and Educational Sciences, Rua Alfredo Allen, s/n, 4200-135 Porto, Portugal.

5Ankara University, Department of Preschool Education, Egitim Bilimleri Fakultesi Cebeci, 06590 Ankara, Turkey.

6Ozyegin University, Department of Psychology, Nisantepe Mah Orman Sok, 34794 Cekmekoy, Turkey.

7Costa Rican Institute of Technology, Calle 15, Avenida 14. Km 1 sur de la Basílica de los Ángeles, Cartago 30101, Costa Rica.

8Mutalités Chrétiennes,Research and Development Department, Chaussée de Haecht 579, 1031 Brussels, Belgium.

9University of Jyväskylä, Department of Psychology, P.O. Box 35, 40014 University of Jyväskylä, Finland.

10University of Lausanne(UNIL), Department DP CHUV, Avenue Pierre-Decker 5, CH 1011 Lausanne, Switzerland.

11University of Rwanda, Department of Psychology, Huye Campus, Southern Province, University of Rwanda, Rwanda.

12Federal University in São Carlos, Department of Psychology, Rodovia Washington Luís km 235, 13564-180 São Carlos, Brazil.

13Saint-Joseph University, Department of Psychology, Rue de Damas, B.P. 17-5208- Mar Mikhael, Beyrouth 11042020, Lebanon.

14Ghent University, Faculty of Psychology and Educational Sciences, Henri Dunantlaan 2, 9000 Gent, Belgium.

15Université Paris Descartes, Laboratory of Psychopathology and Health Processes, 71 Av Edouard Vaillant, 92000 Boulogne-Billancourt Cedex, France.

16University of Wroclaw, Institute of Psychology, Dawida 1, 50-527 Wroclaw, Poland.

17 Université du Québec à Trois-Rivières, Department of Psychology, 3351 Boul des Forges, Trois-Rivières QC, G8Z 4M3, Canada.

18Fudan University, Department of Psychology, 220 Handan Road, Shanghai 200433, China.

19Université de Paris, LPPS, Department of Psychology, 71 avenue Edouard Vaillant, 92100 Boulogne-Billancourt, France.

20University of São Paulo, Department of Psychology, Avenue. Dr. Renato Pagano 416-A, Cravinhos, São Paulo, Brazil.

21University College London, Division of Psychology and Language Sciences, 26 Bedford Way, London WC1H 0AP, United Kingdom.

22EPSM de l'Agglomération Lilloise, Psychiatrie adulte, 1 Rue de Lommelet, 59350 Saint-André-lez-Lille, France.

23University of Geneva, Department of Psychology, Uni Mail, 40 Bvd du Pont d'Arve, 1205 Geneva, Switzerland.

24 Alpen-Adria-Universität Klagenfurt, Abteilung für Gesundheitspsychologie, Universitätsstraße 65-67, 9020 Klagenfurt, Austria.

25Charité-Universitätsmedizin Berlin, Institute for Social Medicine, Epidemiology and Health Economics, Luisenstr. 57, 10117 Berlin, Germany.

26University of Coimbra, Faculty of Psychology and Educational Sciences, Rua do Colégio Novo, Ap.6153, 3000-115 Coimbra, Portugal.

27Université du Québec à Trois-Rivières, Département de Psychologie, 3351 Boulevard Des Forges, Trois-Rivières, Québec, Canada.

28Harvard University, Harvard Business School, Soldiers Field Boston, MA 02163, USA.

29DGASPC Timis, Department of Psychology, Pta Regina Maria Nr.3, Timisoara, Romania.

30University of the Punjab, Institute of Education and Research, Lahore, Pakistan.

31University of Social Sciences and Humanities, HoChiMinh National University, Faculty of Psychology, 10 - 12 Dinh Tien Hoang, Ho Chi Minh City, Vietnam.

32Hokkai-gakuen University, Faculty of Business Administration, 4-1-40, Asahimachi, Toyohiraku, Sapporo, Japan.

33Affiliation at the time: Chubu University, College of Humanities, Department of Psychology, 1200 Matsumoto-cho, Kasugai, Aichi 487-8501, Japan.

34University of Belgrade, Institute of Psychology, Cika Ljubina 18-20, 11000 Belgrade, Serbia.

35Université de Lomé, Department of Applied Psychology, Rue Doumassessé 01, BP: 1515 Lomé, Togo.

3§Université de Nimes, Department of Psychology, 5 Rue du Docteur Georges Salan CS 13019, 30021 Nîmes, France.

37Rio de Janeiro State University, Department of Psychology, Place Edmundo March 20, flat 201, Boa Viagem, Niterói, Rio de Janeiro, Brazil.

38The University of Sydney, School of Psychology, Manning Road, Sydney, Australia.

39Universidad San Martín de Porres, Psychology Research Institute, Av. Tomás Marsano 242, Lima 34, Peru.

40Pontificia Universidad Católica del Ecuador, Faculty of Psychology, Av. 12 de Octubre 1076 y Roca Quito, Ecuador.

41University of Padua, Department of Women’s and Children’s Health, Via Giustiniani 3, 35128 Padua, Italy.

42Universidad Nacional de Educación a Distancia, Departamento de Psicololgía Social y de las Organizaciones, Avda. Valencia 13-19, 50005 Zaragoza, Spain.

43Alzahra University, Research Group of Psychology, Women Research Center, North Sheikh Bahaee St., Deh-e Vanak, 1993891176 Tehran, Iran.

44Université Mohamed Benahmed Oran2, Department of Psychology, 109 rue de Mostaganem, Oran, Algeria.

45West University in Timisoara, Social Work Department, West University, Bul. Vasile Parvan nr.4, Timisoara, Romania.

46Université de Yaoundé 1, Department of Psychology, BP. 8056 Yaounde, Cameroon.

47Ulm University, Institute of Psychology and Education, Albert-Einstein-Allee 47, 89081 Ulm, Germany.

48Dalarna University, School of Education, Health and Social Studies, Högskolan Dalarna, 79188 Falun, Sweden.

49Universidad Santo Tomás, Department of Psychology, Avenida Carlos Schorr 255, Talca, Región del Maule, Chile.

50University College London, Department of Psychology, 26 Bedford Way, Bloomsbury, London WC1H 0AP, United Kingdom.

51Konrad Lorenz University Foundation, Department of Psychology, Cra. 9 Bis #62-43, 110231 Bogotá, Colombia.

52Florida International University, Counseling, Recreation and School Psychology, 11200 SW 8 Str, Miami, Florida, USA.

53Universidad Nacional de Tucumán, Facultad de Medicina, Las Heras 429 7mo. B, Argentina.

54National Pedagogic University, Estudios Psicológicos en Educación y Bienestar, Academic Area 3, Carretera al Ajusco 24, Héroes de Padierna, Tlalpan, 14200 CDMX Área 3, Mexico.

55Université Toulouse 2 - Jean Jaurès, UT2J, Centre d’Etudes et de Recherches en Psychopathologie et Psychologie de la Santé (CERPPS), Maison de la Recherche, 5 allées Antonio Machado, 31058 Toulouse Cedex 9, France.

56University of the Basque Country, Department of Personality, Evaluation and Psychological Treatments, Tolosa Hiribidea 70, Donostia 20018, Gipuzkoa, Basque Country, Spain.

57Aix-Marseille Université, Centre de Recherche en Psychologie de la Connaissance, du Langage et de l’Emotion, Maison de la Recherche, 29 Av. Schuman, 13621 Aix-en-Provence Cedex 1, France.

58University of Rwanda, Department of Clinical Psychology, Kigali, Gikondo-Street, KK737, P.O. Box 4285 Kigali, Rwanda.

59Universidad de la República Uruguay, Department of Psychology, Edificio Central, Tristán Narvaja 1674, Montevideo, Uruguay.

60 University of Padova, Department of Developmental and Social Psychology, Via Venezia 8, 35141 Padova, Italy.

61University West, Department of Social and Behavioral Studies, 461 86 Trollhättan, Sweden.

62University of Bucharest, Teacher Training Department, Panduri Street 90, Bucharest, Romania.

63Saint-Petersburg State University, Department of Psychological Ensuring of Professional Activity, 7-9 Universitetskaya Emb., St Petersburg, 199034, Russia.

64SWPS University of Social Sciences and Humanities, Faculty of Psychology in Sopot, Department of Psychology, 81–745 Sopot, ul. Polna 16/20, Poland.

65Universidad de Costa Rica, Instituto de Investigaciones Psicológicas, 11501-2060 San José, Costa Rica.

66Bahcesehir University, Department of Psychology, Guney Yerleskesi, Besiktas, Istanbul, Turkey.

67University of Habana, Faculty of Psychology, San Rafael # 1168 e/. Mazón y Baserrate Plaza, Ciudad de La Habana, Cuba.

68Chiang Mai University, Department of Psychology, 239 Suthep, Muang Chiang Mai, Chiang Mai 50200, Thailand.
